# Supplementary material for: Integrated Care: Meeting Mental Health Needs After the Gulf Oil Spill
Source: Atypon-hosted journal article supplement (doi:10.1176/appi.ps.201300470), 2014-03-01
Supplement: 280_ds001.pdf [file 280_ds001.pdf]

Table 1. *Pre-post changes in clinical outcome measures*

|                            | N   | Mean | SD   | ES<br>Intake to 1 | ES<br>Intake to 3 |
|----------------------------|-----|------|------|-------------------|-------------------|
| PTSD Intake                | 297 | 3.00 | 1.06 |                   |                   |
| PTSD 1 Month               | 142 | 2.51 | 1.06 | .46               |                   |
| PTSD 3 Month               | 91  | 2.59 | 1.02 |                   | .39               |
| Depression Intake          | 335 | 2.01 | .77  |                   |                   |
| Depression 1<br>Month      | 145 | 1.61 | .91  | .52               |                   |
| Depression 3<br>Month      | 94  | 1.55 | .85  |                   | .60               |
| GAD Intake                 | 345 | 2.19 | .80  |                   |                   |
| GAD 1 Month                | 146 | 1.63 | .95  | .70               |                   |
| GAD 3 Month                | 95  | 1.60 | .89  |                   | .74               |
| Physical Health<br>Intake  | 335 | .92  | .41  |                   |                   |
| Physical Health 1<br>Month | 143 | .78  | .40  | .34               |                   |
| Physical Health 3<br>Month | 94  | .84  | .39  |                   | .20               |
